# Supplementary material for: Regulatory Phosphorylation of Ikaros by Bruton's Tyrosine Kinase
Source: PubMed Central journal article supplement (PMC3747153; doi:10.1371/journal.pone.0071302), 2013-08-19
Supplement: pone.0071302.s001.pdf [file pone.0071302.s001.pdf]

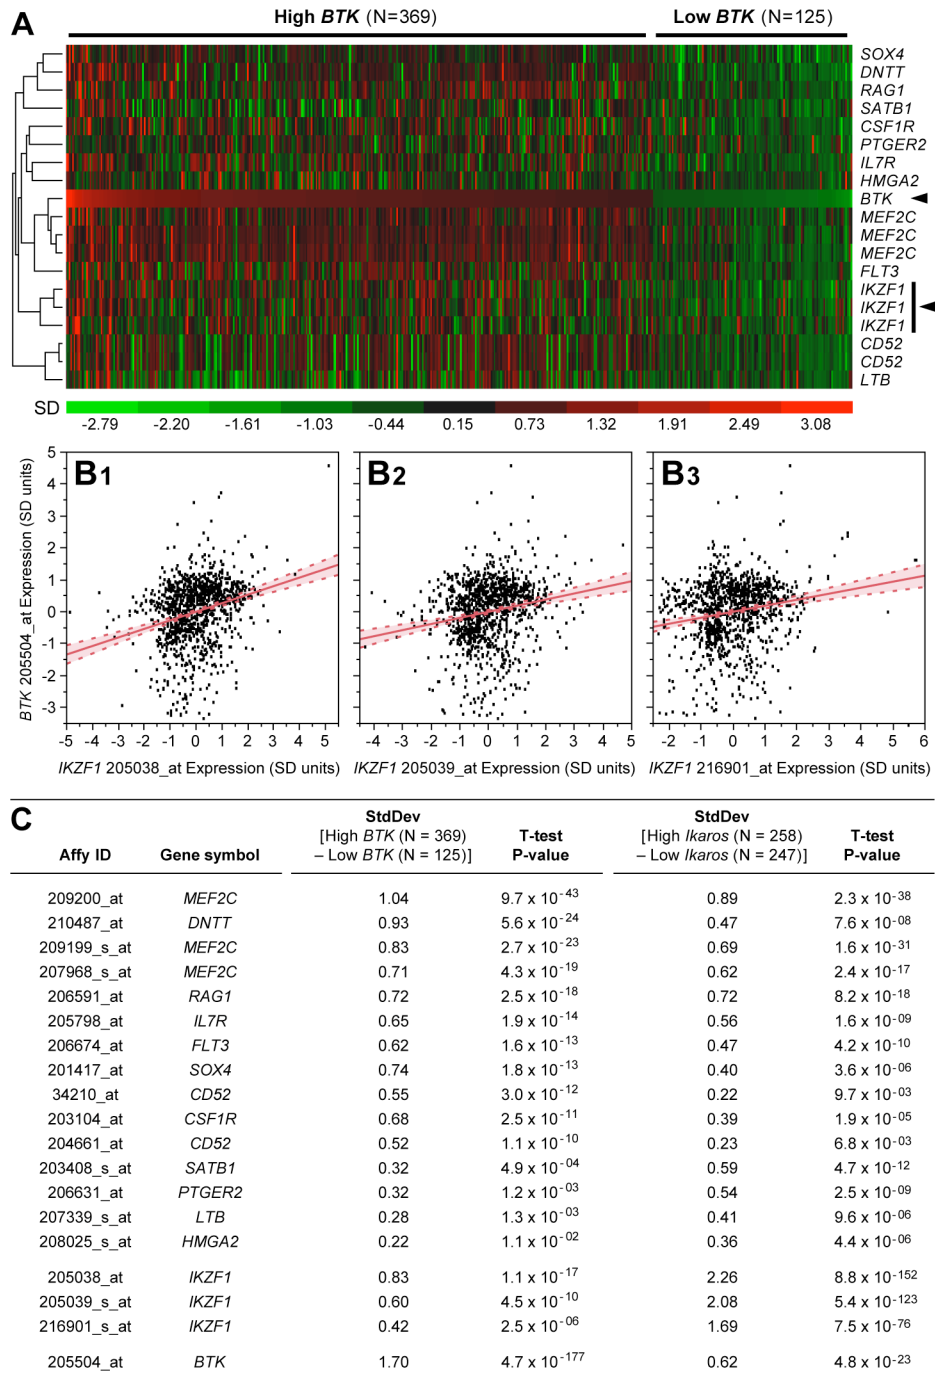

**Figure S1. Expression Levels of Lymphoid-priming Genes in Primary Lymphocyte Precursors from B-lineage ALL Patients in Relationship to *BTK* Transcript Levels.**

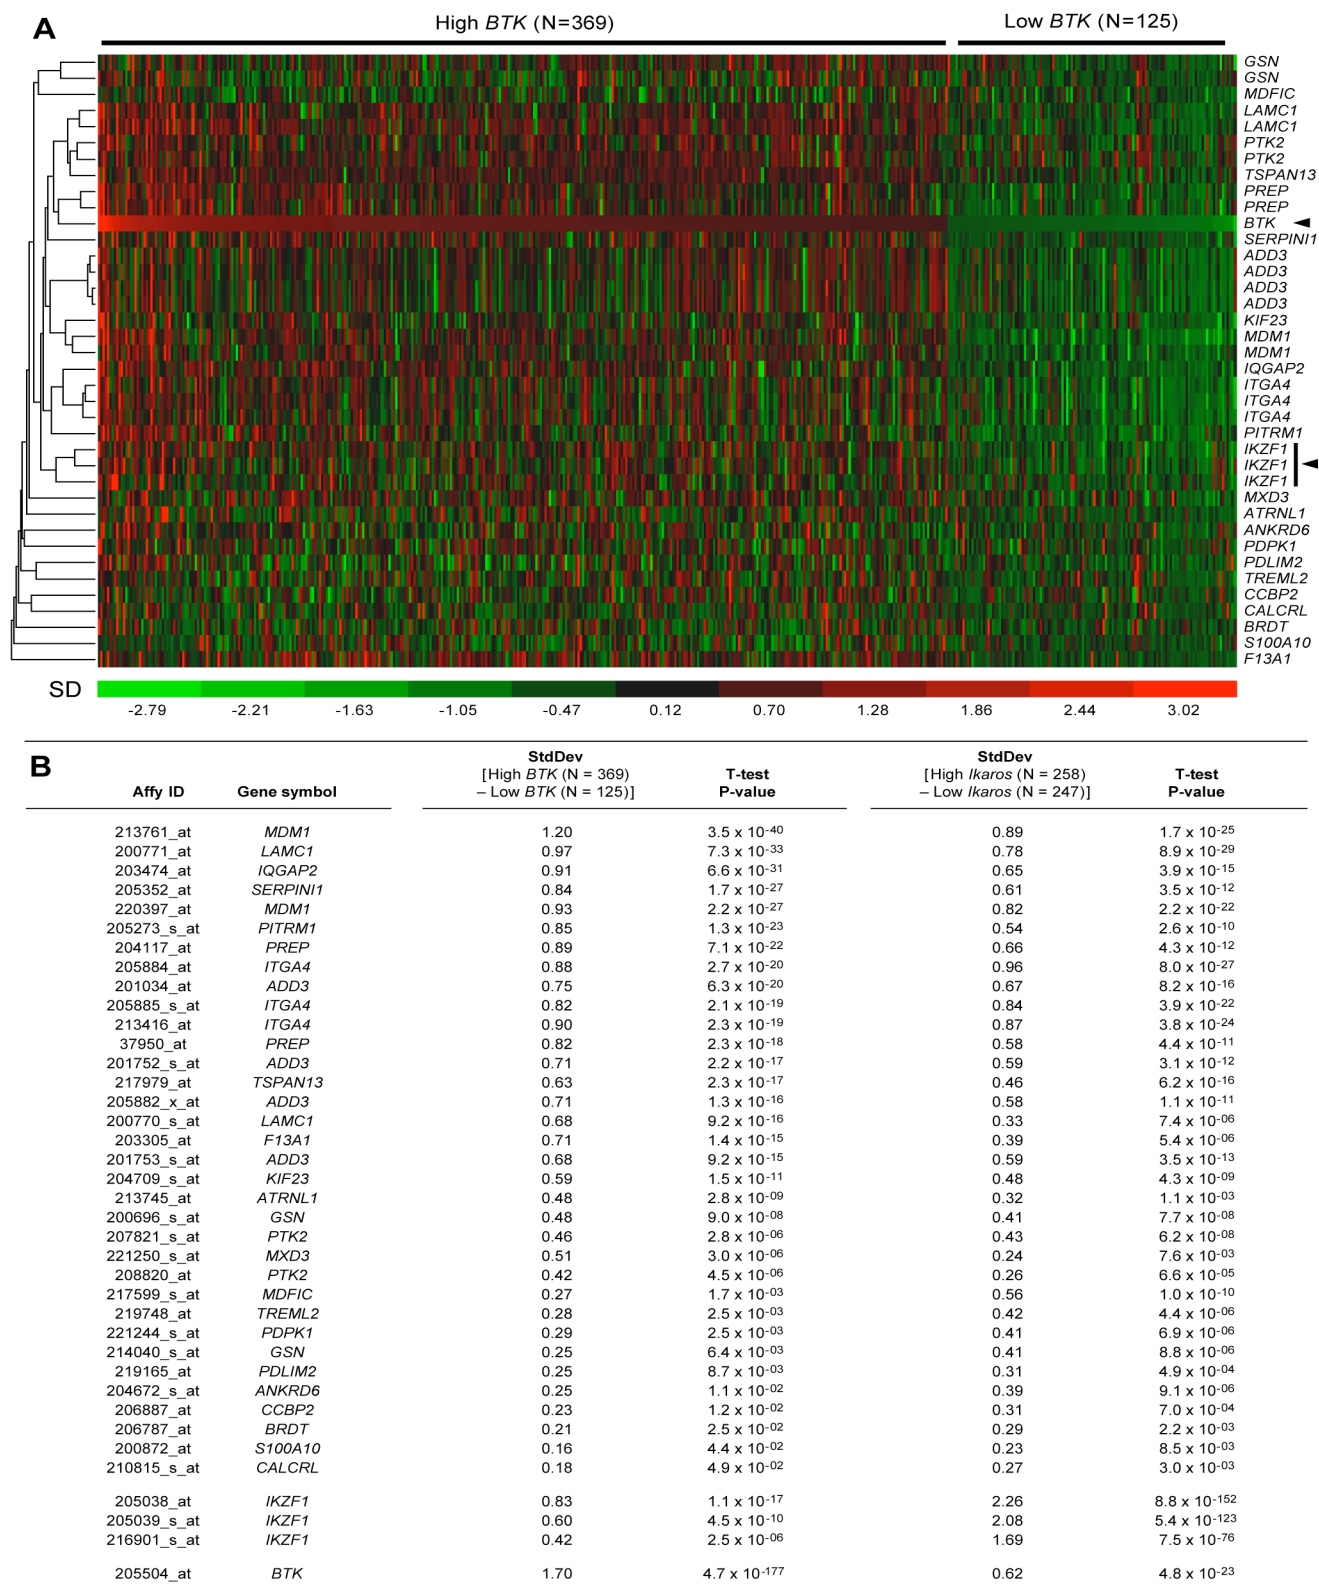

**Figure S2. Expression Levels of Validated Ikaros Target Genes in Primary Lymphocyte Precursors from B-lineage ALL Patients in Relationship to *BTK* Transcript Levels.**

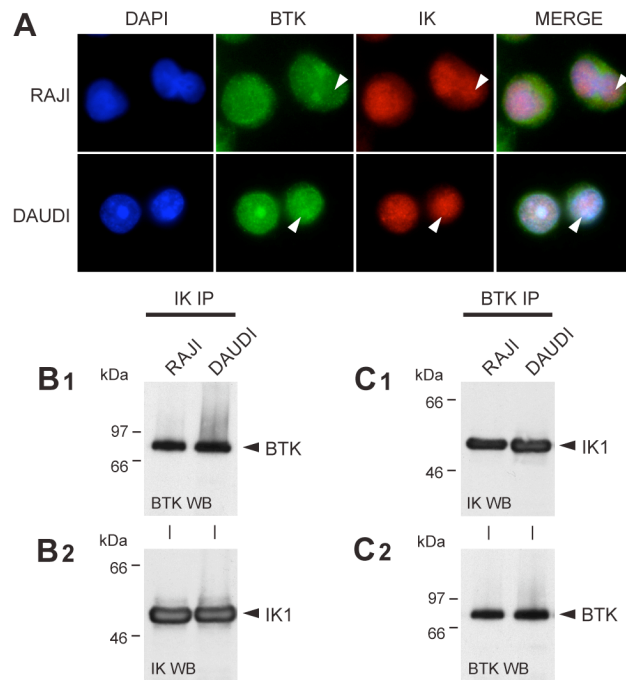

**Figure S3. Co-localization and Physical Interactions of Native Ikaros and BTK Proteins in Human Cells.**

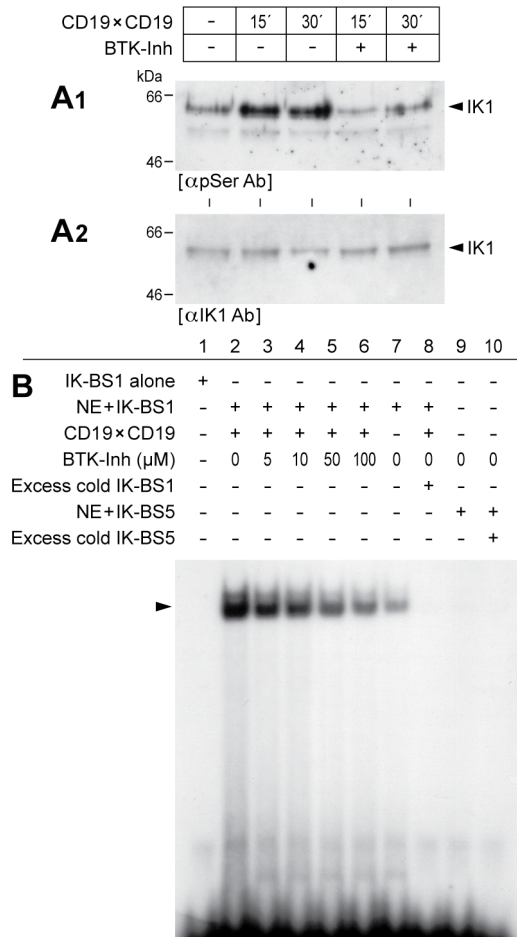

**Figure S4. Effects of BTK Inhibition on CD19-Mediated Activation of IK in Human B-lineage Lymphoid Cells.**
